# Supplementary material for: Circulating miRNA Profiling in Plasma Samples of Ovarian Cancer Patients
Source: MDPI journal article supplement (doi:10.3390/ijms20184533), 2019-09-13
Supplement: s1 [file s1]

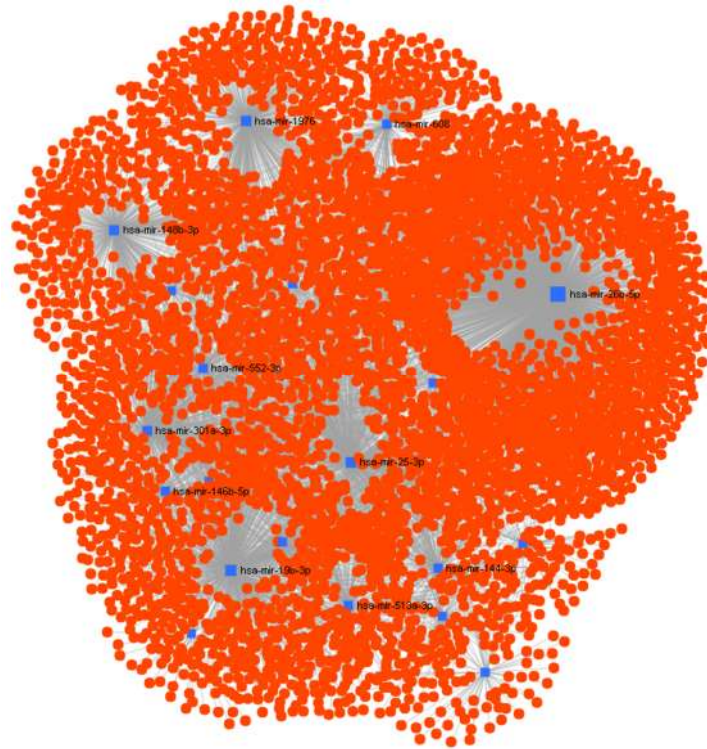

**Figure 1a.** The complete miRNA-target proteins interaction network of Group 1 miRNAs.

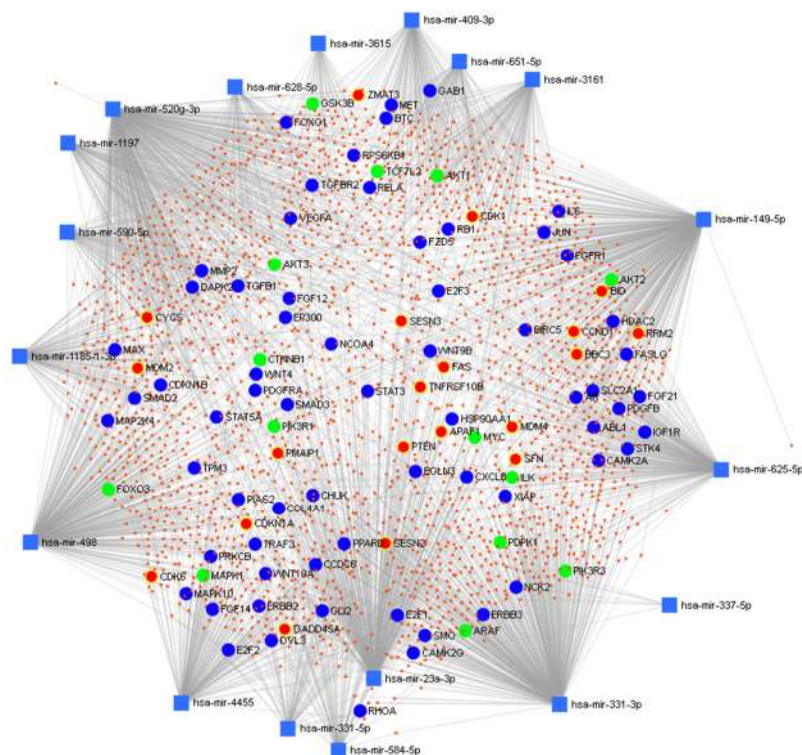

**Figure 1b.** The complete miRNA-target proteins interaction network of Group 2 miRNAs. The colored hubs are proteins known to play a role in tumorigenesis.
