# Supplementary material for: Circulating miRNA Profiling in Plasma Samples of Ovarian Cancer Patients
Source: MDPI journal article supplement (doi:10.3390/ijms20184533), 2019-09-13
Supplement: s1 [file s1]

**Table 2.** Targets of differentially expressed miRNAs

| Group 1 targtes | Group 2 targtes | Group 3 targtes | Combined_targets |
|-----------------|-----------------|-----------------|------------------|
| ABCA1           | AASDHPPT        | ABCB1           | AASDHPPT         |
| ABCA2           | ABRA            | AGO1            | ABCA1            |
| ABCF2           | APAF1           | AKAP11          | ABCA2            |
| ACVR1           | ATAT1           | AMOT            | ABCB1            |
| ACSL4           | ATF3            | ANKEF1          | ABCF2            |
| Adamts1         | BBC3            | ANLN            | ABRA             |
| ALCAM           | BRCA1           | AP5Z1           | ACVR1            |
| ALKBH6          | BTG2            | ARTN            | ACSL4            |
| APP             | C16orf72        | ASCL1           | Adamts1          |
| ARHGEF28        | C20orf24        | ATM             | AGO1             |
| ARID4B          | C5orf15         | AURKB           | AKAP11           |
| ARL4C           | CDH1            | BCL2            | ALCAM            |
| ATP2A2          | CELF1           | BIRC5           | ALKBH6           |
| ATXN1           | CHL1            | BMP4            | AMOT             |
| BACE1           | CHUK            | BRCA1           | ANKEF1           |
| BCL2L11         | CREB5           | BTRC            | ANLN             |
| BCL3            | CXCL12          | CAPRIN1         | AP5Z1            |
| BIRC5           | CXCL8           | CARM1           | APAF1            |
| BLCAP           | DAPK2           | CCL3            | APP              |
| BMPR2           | DDX3X           | CCND3           | ARHGEF28         |
| BTBD3           | DOHH            | CCNE1           | ARID4B           |
| BTN2A2          | E2F1            | CDC25A          | ARL4C            |
| CASQ1           | ERBB2           | CDC27           | ARTN             |
| CASR            | EZH2            | CDC37L1         | ASCL1            |
| CCKBR           | FANCG           | CDK2            | ATAT1            |
| CCL26           | FAS             | CDK4            | ATF3             |
| CCNE1           | FASLG           | CFTR            | ATM              |
| CDC14A          | FGA             | CHEK1           | ATP2A2           |
| CDH1            | FGB             | CHUK            | ATXN1            |
| CDK6            | FGF21           | CLUAP1          | AURKB            |
| CDKN1A          | FGFR1           | COPS6           | BACE1            |
| CDKN1C          | FGG             | COPS8           | BBC3             |
| CEP350          | FHIT            | CTDNEP1         | BCL2             |
| CFTR            | FOXA1           | CXCL2           | BCL2L11          |
| CHORDC1         | FOXM1           | CYB5A           | BCL3             |
| COL1A2          | FOXO3           | CYLD            | BIRC5            |
| COX2            | FZD5            | DEPDC1          | BLCAP            |
| CPEB1           | G6PC            | DICER1          | BMP4             |
| CTGF            | GABRG1          | DPYSL5          | BMPR2            |
| CUL5            | GIT1            | E2F1            | BRCA1            |
| CYBB            | GJA1            | E2F3            | BTBD3            |

|          |          |          |          |
|----------|----------|----------|----------|
| CYP19A1  | GLS      | ECT2     | BTG2     |
| CYP2B6   | GPC1     | EFHD2    | BTN2A2   |
| CSF1     | HES1     | EIF4E    | BTRC     |
| DDX3X    | HIP1R    | EPB41L3  | C16orf72 |
| DHFR     | HLA-G    | ESRRA    | C20orf24 |
| DNMT1    | HMGA1    | EZH2     | C5orf15  |
| DSC2     | HMGB2    | FAM43A   | CAPRIN1  |
| DUSP5    | HMGN2    | FBXW7    | CARM1    |
| EGFR     | HNF1B    | FOXO1    | CASQ1    |
| EIF4A2   | HOTAIR   | FOXO3    | CASR     |
| EPHA2    | HOXB4    | FYN      | CCKBR    |
| ERBB2    | HOXB7    | GIT1     | CCL26    |
| ERBB4    | HRG      | GPC4     | CCL3     |
| ESR1     | HSP90AA1 | GPS1     | CCND3    |
| ESRRB    | IGF2BP1  | GXYLT2   | CCNE1    |
| ETS1     | IL6      | HAX1     | CDC14A   |
| EZH2     | IL6R     | HDGF     | CDC25A   |
| FAM218A  | ILF3     | HSP90B1  | CDC27    |
| FBXW7    | ILK      | HSPA4L   | CDC37L1  |
| FGA      | ING5     | IGF1     | CDH1     |
| FGB      | IRF1     | IGF1R    | CDK2     |
| FGF2     | IRS1     | IKBKB    | CDK4     |
| FGG      | KCNJ6    | IL13     | CDK6     |
| FH       | KLF3     | IL2      | CDKN1A   |
| FOXC1    | KRTAP5-9 | IL23R    | CDKN1C   |
| FUT11    | LAMP1    | IL6      | Cellf1   |
| GATA4    | LDHA     | INHBA    | CEP350   |
| GCLC     | LDHB     | IRF4     | CFTR     |
| GCM1     | LPAR1    | ITPRIPL2 | CHEK1    |
| GSTP1    | LRP5     | KCNN4    | CHL1     |
| GRIK3    | MEF2C    | KHSRP    | CHORDC1  |
| GRK4     | MET      | LIF      | CHUK     |
| HAND2    | MMP2     | LMO2     | CLUAP1   |
| HAS2     | MT2A     | LRRC55   | COL1A2   |
| HGF      | MTHFR    | LRRC58   | COPS6    |
| HIPK1    | MYD88    | MACC1    | COPS8    |
| HIPK3    | MYH1     | MAFB     | COX2     |
| HLA-G    | MYH2     | MAFK     | CPEB1    |
| HNRNPD   | MYH4     | MAP2K1   | CREB5    |
| HOTAIR   | NEK6     | MEF2C    | CTDNEP1  |
| HSP90AA1 | NPM3     | MET      | CTGF     |
| IGF1     | NRP2     | MMP16    | CUL5     |
| IGF1R    | NTRK3    | MSMO1    | CXCL12   |
| IGF2     | OLR1     | MTA1     | CXCL2    |

|         |          |         |         |
|---------|----------|---------|---------|
| IL6     | PABPC3   | MTFR1L  | CXCL8   |
| IL6ST   | PHLPP1   | MTOR    | CYB5A   |
| IRAK1   | PLEKHA1  | MYC     | CYBB    |
| IRS1    | POU4F2   | MYL9    | CYLD    |
| ITGA5   | PPARGC1A | NCKAP1  | CYP19A1 |
| JAG1    | PPM1F    | NEUROG1 | CYP2B6  |
| KAT2A   | PPP1R1A  | NFIA    | CSF1    |
| KAT2B   | PPP2R2A  | NFIX    | DAPK2   |
| KCNJ6   | PPP2R5E  | NHLRC3  | DDX3X   |
| KDELR1  | PPP3R1   | NLRP3   | DEPDC1  |
| KIT     | PRDX3    | NPM3    | DHFR    |
| KLF4    | PRNP     | NRG1    | DICER1  |
| KPNA2   | PRPF8    | NWD1    | DNMT1   |
| LARP1   | PTEN     | OTUD7B  | DOHH    |
| LATS2   | PTGER2   | PARP1   | DPYSL5  |
| LHCGR   | PTPN11   | PAX6    | DSC2    |
| LONRF3  | RB1      | PBX3    | DUSP5   |
| MALAT1  | RBFOX2   | PDE6A   | E2F1    |
| MAP2K4  | RECK     | PHACTR4 | E2F3    |
| MAP3K5  | RECQL    | PHLDA3  | ECT2    |
| MAP3K8  | RGS5     | PIGO    | EFHD2   |
| MAP3K9  | ROCK1    | PLEKHG3 | EGFR    |
| MDM2    | Runx2    | POLR3A  | EIF4A2  |
| MED28   | SCAI     | POLR3G  | EIF4E   |
| MEOX2   | SEC62    | PRDM1   | EPB41L3 |
| MET     | SMAD3    | PRKAA1  | EPHA2   |
| MID1IP1 | SMAD5    | PTBP2   | ERBB2   |
| MIEN1   | SMAD7    | PXK     | ERBB4   |
| MLH1    | SOCS6    | RAF1    | ESR1    |
| MMP16   | SOX2     | RBM23   | ESRRA   |
| MSANTD4 | SP1      | Reck    | ESRRB   |
| MTMR6   | SPRY2    | RHOA    | ETS1    |
| MTOR    | SREK1    | RHOB    | EZH2    |
| MTUS1   | SRP54    | RNF41   | FAM218A |
| MXD1    | ST7L     | RPS6KB1 | FAM43A  |
| MYBL2   | STAT3    | RRAS2   | FANCG   |
| MYC     | TCEAL1   | RSL1D1  | FAS     |
| MYCN    | TERF2    | RUNX2   | FASLG   |
| MYLIP   | TERT     | SAR1A   | FBXW7   |
| NAMPT   | TGFBR2   | SCARB1  | FGA     |
| NCOA3   | TMEM64   | SDK1    | FGB     |
| NDFIP1  | TMPO     | SEMA3A  | FGF2    |
| NFE2L2  | TOP1     | SF3B1   | FGF21   |
| NFKB1   | TRIM63   | SIT1    | FGFR1   |

|         |        |           |        |
|---------|--------|-----------|--------|
| NKRF    | TSC1   | SKI       | FGG    |
| NOTCH1  | UNC13A | SLC25A51  | FH     |
| NOVA1   | VEGFA  | SLC2A4    | FHIT   |
| NR2C2   | VMP1   | SMAD7     | FOXA1  |
| NRAS    | WWP1   | SMU1      | FOXC1  |
| NUP54   | XIAP   | SMURF1    | FOXO1  |
| PAPD7   | ZBTB2  | SOCS1     | FOXO1  |
| PAX8    | ZC3H4  | SOX4      | FOXO3  |
| PBX3    | ZFHX4  | SP1       | FUT11  |
| PCSK2   | ZFX    | SP3       | FYN    |
| PDE4A   | ZNF367 | SSRP1     | FZD5   |
| PDGFRA  |        | STAT1     | G6PC   |
| PIK3CA  |        | STAT3     | GABRG1 |
| PIK3R2  |        | STAT5A    | GATA4  |
| PIK3R3  |        | STMN1     | GCLC   |
| PITX1   |        | STRN3     | GCM1   |
| PIWIL4  |        | SUGT1     | GIT1   |
| PKNOX1  |        | TAL1      | GJA1   |
| PLAG1   |        | TAX1BP1   | GLS    |
| PLEKHA1 |        | TERT      | GPC1   |
| PLOD2   |        | TGOLN2    | GPC4   |
| POP7    |        | TLR4      | GPS1   |
| PPP2R5E |        | TNFRSF13C | GRIK3  |
| PRKAA1  |        | TOX       | GRK4   |
| PRKAB1  |        | TRIM72    | GSTP1  |
| PRMT5   |        | TTC4      | GXYLT2 |
| PSG4    |        | TWIST1    | HAND2  |
| PTBP2   |        | UBR3      | HAS2   |
| PTEN    |        | USP48     | HAX1   |
| PTGS2   |        | VEGFA     | HDGF   |
| PXK     |        | WEE1      | HES1   |
| RAB24   |        | WNT7A     | HGF    |
| RAN     |        | XBP1      | HIP1R  |
| RARB    |        | ZEB1      | HIPK1  |
| RB1     |        | ZKSCAN1   | HIPK3  |
| RECK    |        |           | HLA-G  |
| REM1    |        |           | HMGA1  |
| REV3L   |        |           | HMGB2  |
| RGS3    |        |           | HMGN2  |
| RHOB    |        |           | HNF1B  |
| RNASE1  |        |           | HNRNPD |
| ROCK1   |        |           | HOTAIR |
| RPS27A  |        |           | HOXB4  |
| RUNX3   |        |           | HOXB7  |

SEMA4C  
SERPINE1  
SGSM3  
SIRPB2  
SLC2A1  
SLC30A7  
SLC5A5  
SMAD1  
SMAD4  
SMAD7  
SNIP1  
SOCS1  
SOX4  
SPARC  
ST13  
ST8SIA4  
SWT1  
TAB1  
TCEAL1  
TERT  
TGFB1  
TGFB2  
TIMP2  
TLR2  
TLR4  
TMEM107  
TMF1  
TNFAIP3  
TNFSF10  
TP53  
TPPP  
TRAF5  
TRAF6  
TTC9C  
TTN  
TUG1  
UHRF1  
ULK2  
USP34  
USP9X  
UVRAG  
VAV3  
WDFY2  
WDR4

HRG  
HSP90AA1  
HSP90B1  
HSPA4L  
IGF1  
IGF1R  
IGF2  
IGF2BP1  
IKBKB  
IL13  
IL2  
IL23R  
IL6  
IL6R  
IL6ST  
ILF3  
ILK  
ING5  
INHBA  
IRAK1  
IRF1  
IRF4  
IRS1  
ITGA5  
ITPRIPL2  
JAG1  
KAT2A  
KAT2B  
KCNJ6  
KCNN4  
KDELRL1  
KHSRP  
KIT  
KLF3  
KLF4  
KPNA2  
KRTAP5-9  
LAMP1  
LARP1  
LATS2  
LDHA  
LDHB  
LHCGR  
LIF

WNK3  
WNT1  
WWP1  
XIST  
ZEB1  
ZEB2  
ZFX  
ZIC5  
ZNF154  
ZNF772  
ZNRF3

LMO2  
LONRF3  
LPAR1  
LRP5  
LRRC55  
LRRC58  
MACC1  
MAFB  
MAFK  
MALAT1  
MAP2K1  
MAP2K4  
MAP3K5  
MAP3K8  
MAP3K9  
MDM2  
MED28  
MEF2C  
MEOX2  
MET  
MID1IP1  
MIEN1  
MLH1  
MMP16  
MMP2  
MSANTD4  
MSMO1  
MT2A  
MTA1  
MTFR1L  
MTHFR  
MTMR6  
MTOR  
MTUS1  
MXD1  
MYBL2  
MYC  
MYCN  
MYD88  
MYH1  
MYH2  
MYH4  
MYL9  
MYLIP

NAMPT  
NCKAP1  
NCOA3  
NDFIP1  
NEK6  
NEUROG1  
NFE2L2  
NFIA  
NFIX  
NFKB1  
NHLRC3  
NKRF  
NLRP3  
NOTCH1  
NOVA1  
NPM3  
NR2C2  
NRAS  
NRG1  
NRP2  
NTRK3  
NUP54  
NWD1  
OLR1  
OTUD7B  
PABPC3  
PAPD7  
PARP1  
PAX6  
PAX8  
PBX3  
PCSK2  
PDE4A  
PDE6A  
PDGFRA  
PHACTR4  
PHLDA3  
PHLPP1  
PIGO  
PIK3CA  
PIK3R2  
PIK3R3  
PITX1  
PIWIL4

PKNOX1  
PLAG1  
PLEKHA1  
PLEKHG3  
PLOD2  
POLR3A  
POLR3G  
POP7  
POU4F2  
PPARGC1A  
PPM1F  
PPP1R1A  
PPP2R2A  
PPP2R5E  
PPP3R1  
PRDM1  
PRDX3  
PRKAA1  
PRKAB1  
PRMT5  
PRNP  
PRPF8  
PSG4  
PTBP2  
PTEN  
PTGER2  
PTGS2  
PTPN11  
PXK  
RAB24  
RAF1  
RAN  
RARB  
RB1  
RBFOX2  
RBM23  
RECK  
RECQL  
REM1  
REV3L  
RGS3  
RGS5  
RHOA  
RHOB



RNASE1  
RNF41  
ROCK1  
RPS27A  
RPS6KB1  
RRAS2  
RSL1D1  
RUNX2  
RUNX3  
SAR1A  
SCAI  
SCARB1  
SDK1  
SEC62  
SEMA3A  
SEMA4C  
SERPINE1  
SF3B1  
SGSM3  
SIRPB2  
SIT1  
SKI  
SLC25A51  
SLC2A1  
SLC2A4  
SLC30A7  
SLC5A5  
SMAD1  
SMAD3  
SMAD4  
SMAD5  
SMAD7  
SMU1  
SMURF1  
SNIP1  
SOCS1  
SOCS6  
SOX2  
SOX4  
SP1  
SP3  
SPARC  
SPRY2  
SREK1

SRP54  
SSRP1  
ST13  
ST7L  
ST8SIA4  
STAT1  
STAT3  
STAT5A  
STMN1  
STRN3  
SUGT1  
SWT1  
TAB1  
TAL1  
TAX1BP1  
TCEAL1  
TERF2  
TERT  
TGFB1  
TGFB2  
TGOLN2  
TIMP2  
TLR2  
TLR4  
TMEM107  
TMEM64  
TMF1  
TMPO  
TNFAIP3  
TNFRSF13C  
TNFSF10  
TOP1  
TOX  
TP53  
TPPP  
TRAF5  
TRAF6  
TRIM63  
TRIM72  
TSC1  
TTC4  
TTC9C  
TTN  
TUG1

TWIST1  
UBR3  
UHRF1  
ULK2  
UNC13A  
USP34  
USP48  
USP9X  
UVRAG  
VAV3  
VEGFA  
VMP1  
WDFY2  
WDR4  
WEE1  
WNK3  
WNT1  
WNT7A  
WWP1  
XBP1  
XIAP  
XIST  
ZBTB2  
ZC3H4  
ZEB1  
ZEB2  
ZFHX4  
ZFX  
ZIC5  
ZKSCAN1  
ZNF154  
ZNF367  
ZNF772  
ZNRF3
