# Supplementary material for: Circulating miRNA Profiling in Plasma Samples of Ovarian Cancer Patients
Source: MDPI journal article supplement (doi:10.3390/ijms20184533), 2019-09-13
Supplement: s1 [file s1]

# Supplementary Table I.

Table 1. Demographic and clinicopathological data of the patients.

| Stage    | Name |             | Age        | Tumor      | Histology                               |
|----------|------|-------------|------------|------------|-----------------------------------------|
| Controls | C54  |             | 62         | -          | -                                       |
|          | C63  |             | 60         | -          | -                                       |
|          | C69  |             | 56         | -          | -                                       |
|          | C71  |             | 54         | -          | -                                       |
|          | C84  |             | 53         | -          | -                                       |
|          | C53  |             | 70         | -          | -                                       |
|          |      | <b>Mean</b> | <b>59</b>  |            |                                         |
|          |      | <b>SD</b>   | <b>6,3</b> |            |                                         |
|          |      |             |            |            |                                         |
| FIGO IV  | U50  |             | 75         | Ovarium cc | Cystadenocarcinoma papillare serosum    |
|          | U52  |             | 63         | Ovarium cc | Cystadenocarcinoma papillare serosum    |
|          | U69  |             | 63         | Ovarium cc | Cystadenocarcinoma papillare serosum    |
|          | U46  |             | 50         | Ovarium    | Adenocarcinoma papillare serosum        |
|          | U66  |             | 52         | Ovarium cc | Cystadenocarcinoma papillare serosum    |
|          | U27  |             | 45         | Ovarium cc | Cystadenocarcinoma papillare serosum    |
|          |      | <b>Mean</b> | <b>58</b>  |            |                                         |
|          |      | <b>SD</b>   | <b>11</b>  |            |                                         |
|          |      |             |            |            |                                         |
| FIGO III | U41  |             | 62         | Ovarium cc | Cystadenocarcinoma papillare serosum    |
|          | U49  |             | 56         | Ovarium cc | Cystadenocarcinoma papillare serosum    |
|          | U55  |             | 51         | Ovarium cc | Cystadenocarcinoma papillare serosum    |
|          | U56  |             | 57         | Ovarium cc | Adenocarcinoma partim papillare serosum |
|          | U67  |             | 60         | Ovarium cc | Cystadenocarcinoma papillare serosum    |
|          | U25  |             | 73         | Ovarium cc | Cystadenocarcinoma papillare serosum    |
|          |      | <b>Mean</b> | <b>60</b>  |            |                                         |
|          |      | <b>SD</b>   | <b>7,5</b> |            |                                         |
|          |      |             |            |            |                                         |
| Figo I   | U60  |             | 61         | Ovarium cc | Cystadenocarcinoma papillare serosum    |
|          | U53  |             | 62         | Ovarium cc | Cystadenocarcinoma papillare serosum    |
|          | U61  |             | 72         | Ovarium cc | Cystadenocarcinoma papillare serosum    |
|          | U81  |             | 43         |            | Cystadenocarcinoma papillare serosum    |
|          | U86  |             | 43         |            | Cystadenocarcinoma papillare serosum    |
|          | U62  |             | 28         | Ovarium cc | Cystadenocarcinoma papillare serosum    |
|          |      | <b>Mean</b> | <b>52</b>  |            |                                         |
|          |      | <b>SD</b>   | <b>16</b>  |            |                                         |
