# Supplementary material for: Circulating miRNA Profiling in Plasma Samples of Ovarian Cancer Patients
Source: Int J Mol Sci. 2019 Sep 13;20(18):4533. doi: 10.3390/ijms20184533 (PMC6769773; doi:10.3390/ijms20184533)
Supplement: Supplementary file 1 [file ijms-20-04533-s001.zip]

Archive with 4 entries (4 files):
- Supplementary Table 1.pdf
- Supplementary Table 2.pdf
- Supplementary Table 3.docx
- Supplemetary Figure 1a-c.pdf
