# Supplementary material for: Circulating miRNA Profiling in Plasma Samples of Ovarian Cancer Patients
Source: Int J Mol Sci. 2019 Sep 13;20(18):4533. doi: 10.3390/ijms20184533 (PMC6769773; doi:10.3390/ijms20184533)
Supplement: Supplementary file 1 [file ijms-20-04533-s001.zip › Supplementary Table 3.docx]

**Table 3.** The functional annotation of target genes of Gr 1 miRNAs based on their enrichment in specific KEGG pathways.

| | **Gr. 1 miRNAs KEGG** | **Gene Count** | **P Value** | **Fold Enrichment** | | --- | --- | --- | --- | |  |  |  |
| --- | --- | --- | --- | --- | --- | --- | --- |
| | hsa05200:Pathways in cancer | 42 | 9.6869E-19 | 5.0700 | | --- | --- | --- | --- | | hsa04151:PI3K-Akt signaling pathway | 33 | 4.0540E-13 | 4.5378 | | hsa05205:Proteoglycans in cancer | 25 | 2.1642E-12 | 5.9301 | | hsa04068:FoxO signaling pathway | 19 | 2.3841E-10 | 6.7267 | | hsa05230:Central carbon metabolism in cancer | 14 | 4.5250E-10 | 10.3778 | | hsa05169:Epstein-Barr virus infection | 16 | 2.8310E-8 | 6.2218 | | hsa04066:HIF-1 signaling pathway Hypoxia-inducible factor 1 (HIF-1) | 14 | 7.8362E-8 | 6.9185 | | hsa05213:Endometrial cancer | 11 | 8.8183E-8 | 10.0356 | | hsa04919:Thyroid hormone signaling pathway | 15 | 9.5781E-8 | 6.1880 | | hsa05203:Viral carcinogenesis | 17 | 5.1180E-6 | 3.9341 | | hsa04620:Toll-like receptor signaling pathway | 12 | 1.1690E-5 | 5.3707 | | hsa04012:ErbB signaling pathway | 11 | 1.1935E-5 | 5.9983 | | hsa04150:mTOR signaling pathway | 9 | 2.4024E-5 | 7.3615 | | hsa04014:Ras signaling pathway | 16 | 6.9494E-5 | 3.3586 | | hsa04931:Insulin resistance | 11 | 7.9440E-5 | 4.8319 | | hsa04510:Focal adhesion | 15 | 9.5188E-5 | 3.4544 | | hsa04015:Rap1 signaling pathway | 15 | 1.1699E-4 | 3.3886 | | hsa04152:AMPK signaling pathway | 11 | 2.3561E-4 | 4.2427 | | hsa04110:Cell cycle | 11 | 2.5175E-4 | 4.2085 | | hsa04390:Hippo signaling pathway | 12 | 3.0203E-4 | 3.7701 | | hsa04350:TGF-beta signaling pathway | 9 | 3.4560E-4 | 5.0830 | | hsa04115:p53 signaling pathway | 8 | 4.6347E-4 | 5.6646 | | hsa04917:Prolactin signaling pathway | 8 | 6.6112E-4 | 5.3455 | | hsa04722:Neurotrophin signaling pathway | 10 | 8.7443E-4 | 3.9534 | | hsa04071:Sphingolipid signaling pathway | 10 | 8.7443E-4 | 3.9534 | |  |  |  |

**Table 1.** The functional annotation of target genes of Gr 2 miRNAs based on their enrichment in specific KEGG pathways.

| | **Gr. 2 miRNAs KEGG** | **Gene Count** | **P Value** | **Fold Enrichment** | | --- | --- | --- | --- | |  |  |  |
| --- | --- | --- | --- | --- | --- | --- | --- |
| | hsa05200:Pathways in cancer | 26 | 2.5067E-11 | 4.8935 | | --- | --- | --- | --- | | hsa04151:PI3K-Akt signaling pathway | 20 | 9.8090E-8 | 4.2879 | | hsa05205:Proteoglycans in cancer | 12 | 6.5242E-5 | 4.4380 | | hsa04068:FoxO signaling pathway | 10 | 6.8271E-5 | 5.5199 | | hsa05206:MicroRNAs in cancer | 14 | 9.8261E-5 | 3.6207 | | hsa04931:Insulin resistance | 8 | 5.6630E-4 | 5.4790 | | hsa04152:AMPK signaling pathway | 8 | 0.0012 | 4.8109 | | hsa05230:Central carbon metabolism in cancer | 6 | 0.0015 | 6.9344 | | hsa04920:Adipocytokine signaling pathway | 6 | 0.0023 | 6.3400 | | hsa04520:Adherens junction | 6 | 0.0024 | 6.2507 | | hsa05213:Endometrial cancer | 5 | 0.0049 | 7.1122 | | hsa04350:TGF-beta signaling pathway | 6 | 0.0051 | 5.2834 | | hsa05202:Transcriptional misregulation in cancer | 8 | 0.0068 | 3.5433 | | hsa04210:Apoptosis | 5 | 0.0092 | 5.9651 | | hsa04922:Glucagon signaling pathway | 6 | 0.0102 | 4.4828 | | hsa04390:Hippo signaling pathway | 7 | 0.0153 | 3.4289 | | hsa04064:NF-kappa B signaling pathway | 5 | 0.0287 | 4.2510 | | hsa04621:NOD-like receptor signaling pathway | 4 | 0.0385 | 5.2834 | | hsa04550:Signaling pathways regulating pluripotency of stem cells | 6 | 0.0390 | 3.1700 | | hsa04066:HIF-1 signaling pathway | 5 | 0.0392 | 3.8524 | | hsa04915:Estrogen signaling pathway | 5 | 0.0431 | 3.73575 | | hsa04010:MAPK signaling pathway | 8 | 0.0520 | 2.3389 | | hsa04510:Focal adhesion | 7 | 0.0571 | 2.5134 | | hsa04115:p53 signaling pathway | 4 | 0.0600 | 4.4159 | | hsa04722:Neurotrophin signaling pathway | 5 | 0.0764 | 3.0819 | |  |  |  |

**Table 1.** The functional annotation of target genes of Gr 3 miRNAs based on their enrichment in specific KEGG pathways.

| | **Gr. 3 miRNAs KEGG** | **Gene Count** | **P Value** | **Fold Enrichment** | | --- | --- | --- | --- | |  |  |  |
| --- | --- | --- | --- | --- | --- | --- | --- |
| | hsa05206:MicroRNAs in cancer | 23 | 1.5576E-11 | 5.8851 | | --- | --- | --- | --- | | hsa05200:Pathways in cancer | 26 | 3.2507E-11 | 4.84145 | | hsa04151:PI3K-Akt signaling pathway | 24 | 9.2667E-11 | 5.0908 | | hsa04068:FoxO signaling pathway | 14 | 2.23032E-8 | 7.6457 | | hsa05205:Proteoglycans in cancer | 15 | 3.8433E-7 | 5.4885 | | hsa04066:HIF-1 signaling pathway | 11 | 5.4183E-7 | 8.3853 | | hsa04110:Cell cycle | 12 | 7.3022E-7 | 7.0820 | | hsa04550:Signaling pathways regulating pluripotency of stem cells | 12 | 2.4523E-6 | 6.2726 | | hsa05202:Transcriptional misregulation in cancer | 12 | 1.3523E-5 | 5.2585 | | hsa04630:Jak-STAT signaling pathway | 11 | 2.3004E-5 | 5.5516 | | hsa04910:Insulin signaling pathway | 10 | 9.3449E-5 | 5.3029 | | hsa04350:TGF-beta signaling pathway | 8 | 1.2771E-4 | 6.9696 | | hsa05321:Inflammatory bowel disease (IBD) | 7 | 2.0712E-4 | 8.0041 | | hsa04152:AMPK signaling pathway | 9 | 2.3780E-4 | 5.3546 | | hsa04115:p53 signaling pathway | 7 | 2.6688E-4 | 7.6457 | | hsa04917:Prolactin signaling pathway | 7 | 3.6677E-4 | 7.2150 | | hsa04660:T cell receptor signaling pathway | 8 | 3.7883E-4 | 5.8544 | | hsa04510:Focal adhesion | 11 | 4.3102E-4 | 3.9077 | | hsa04931:Insulin resistance | 8 | 6.0459E-4 | 5.4208 | | hsa04062:Chemokine signaling pathway | 10 | 8.6489E-4 | 3.9344 | | hsa04621:NOD-like receptor signaling pathway | 6 | 8.9869E-4 | 7.84080 | | hsa04150:mTOR signaling pathway | 6 | 0.0010 | 7.5704 | | hsa04914:Progesterone-mediated oocyte maturation | 7 | 0.0010 | 5.8881 | | hsa04012:ErbB signaling pathway | 7 | 0.0011 | 5.8881 | | hsa05230:Central carbon metabolism in cancer | 5 | 0.0107 | 5.7172 | |  |  |  |

**Table 1.** The GO-based functional annotation of target genes of Gr 1 miRNAs based on their enrichment in specific GO terms.

| | **Gr. 1 miRNAs GO Biol Proc** | **Gene Count** | **P Value** | **Fold Enrichment** | | --- | --- | --- | --- | |  |  |  |
| --- | --- | --- | --- | --- | --- | --- | --- |
| | GO:0048015~phosphatidylinositol-mediated signaling | 13 | 1.3427E-8 | 9.3608 | | --- | --- | --- | --- | | GO:2000352~negative regulation of endothelial cell apoptotic process | 7 | 1.3620E-6 | 19.0818 | | GO:0043552~positive regulation of phosphatidylinositol 3-kinase activity | 7 | 2.5763E-6 | 17.2351 | | GO:0007179~transforming growth factor beta receptor signaling pathway | 10 | 3.1511E-6 | 8.2964 | | GO:1902042~negative regulation of extrinsic apoptotic signaling pathway via death domain receptors | 7 | 3.7920E-6 | 16.1906 | | GO:0014066~regulation of phosphatidylinositol 3-kinase signaling | 9 | 7.8861E-6 | 8.8069 | | GO:0051592~response to calcium ion | 8 | 9.9686E-6 | 10.5278 | | GO:0007249~I-kappaB kinase/NF-kappaB signaling | 8 | 1.2524E-5 | 10.1769 | | GO:0046854~phosphatidylinositol phosphorylation | 9 | 3.1322E-5 | 7.3079 | | GO:0018108~peptidyl-tyrosine phosphorylation | 11 | 3.2817E-5 | 5.4875 | | GO:0000165~MAPK cascade | 14 | 4.1488E-5 | 4.0785 | | GO:0051092~positive regulation of NF-kappaB transcription factor activity | 10 | 6.2259E-5 | 5.7388 | | GO:0002755~MyD88-dependent toll-like receptor signaling pathway | 6 | 6.3526E-5 | 13.8776 | | GO:0050731~positive regulation of peptidyl-tyrosine phosphorylation | 8 | 9.6758E-5 | 7.4465 | | GO:0070423~nucleotide-binding oligomerization domain containing signaling pathway | 5 | 2.8714E-4 | 15.2654 | | GO:0007254~JNK cascade | 6 | 4.3093E-4 | 9.3461 | | GO:0060389~pathway-restricted SMAD protein phosphorylation | 4 | 5.6820E-4 | 23.4853 | | GO:0038095~Fc-epsilon receptor signaling pathway | 9 | 0.0023 | 3.8592 | | GO:0030509~BMP signaling pathway | 6 | 0.0031 | 6.0258 | | GO:0008286~insulin receptor signaling pathway | 6 | 0.0035 | 5.8713 | | GO:0036092~phosphatidylinositol-3-phosphate biosynthetic process | 5 | 0.00373 | 7.78849 | | GO:0090277~positive regulation of peptide hormone secretion | 3 | 0.0045 | 28.6227 | | GO:0051897~positive regulation of protein kinase B signaling | 6 | 0.0048 | 5.45194 | | GO:0031663~lipopolysaccharide-mediated signaling pathway | 4 | 0.0082 | 9.54090 | | GO:1900026~positive regulation of substrate adhesion-dependent cell spreading | 4 | 0.0082 | 9.5409 | |  |  |  |

**Table 1.** The GO-based functional annotation of target genes of Gr 2 miRNAs based on their enrichment in specific GO terms.

| | **Gr. 2 miRNAs GO Biol Proc** | **Gene Count** | **P Value** | **Fold Enrichment** | | --- | --- | --- | --- | |
| --- | --- | --- | --- | --- |
| | GO:0048015~phosphatidylinositol-mediated signaling | 13 | 1.3427E-8 | 9.3608 | | --- | --- | --- | --- | | GO:2000352~negative regulation of endothelial cell apoptotic process | 7 | 1.3620E-6 | 19.0818 | | GO:0043552~positive regulation of phosphatidylinositol 3-kinase activity | 7 | 2.5763E-6 | 17.2351 | | GO:0007179~transforming growth factor beta receptor signaling pathway | 10 | 3.1511E-6 | 8.2964 | | GO:1902042~negative regulation of extrinsic apoptotic signaling pathway via death domain receptors | 7 | 3.7920E-6 | 16.1906 | | GO:0014066~regulation of phosphatidylinositol 3-kinase signaling | 9 | 7.8861E-6 | 8.8069 | | GO:0051592~response to calcium ion | 8 | 9.9686E-6 | 10.5278 | | GO:0007249~I-kappaB kinase/NF-kappaB signaling | 8 | 1.2524E-5 | 10.1769 | | GO:0046854~phosphatidylinositol phosphorylation | 9 | 3.1322E-5 | 7.3079 | | GO:0018108~peptidyl-tyrosine phosphorylation | 11 | 3.2817E-5 | 5.4875 | | GO:0000165~MAPK cascade | 14 | 4.1488E-5 | 4.0785 | | GO:0051092~positive regulation of NF-kappaB transcription factor activity | 10 | 6.2259E-5 | 5.7388 | | GO:0002755~MyD88-dependent toll-like receptor signaling pathway | 6 | 6.3526E-5 | 13.8776 | | GO:0050731~positive regulation of peptidyl-tyrosine phosphorylation | 8 | 9.6758E-5 | 7.4465 | | GO:0070423~nucleotide-binding oligomerization domain containing signaling pathway | 5 | 2.8714E-4 | 15.2654 | | GO:0007254~JNK cascade | 6 | 4.3093E-4 | 9.3461 | | GO:0060389~pathway-restricted SMAD protein phosphorylation | 4 | 5.6820E-4 | 23.4853 | | GO:0038095~Fc-epsilon receptor signaling pathway | 9 | 0.0023 | 3.8592 | | GO:0030509~BMP signaling pathway | 6 | 0.0031 | 6.0258 | | GO:0008286~insulin receptor signaling pathway | 6 | 0.0035 | 5.8713 | | GO:0036092~phosphatidylinositol-3-phosphate biosynthetic process | 5 | 0.00373 | 7.78849 | | GO:0090277~positive regulation of peptide hormone secretion | 3 | 0.0045 | 28.6227 | | GO:0051897~positive regulation of protein kinase B signaling | 6 | 0.0048 | 5.45194 | | GO:0031663~lipopolysaccharide-mediated signaling pathway | 4 | 0.0082 | 9.54090 | | GO:1900026~positive regulation of substrate adhesion-dependent cell spreading | 4 | 0.0082 | 9.5409 | |

**Table 1.** The GO-based functional annotation of target genes of Gr 3 miRNAs based on their enrichment in specific GO terms.

| | **Gr. 3 miRNAs GO Biol Proc** | **Gene Count** | **P Value** | **Fold Enrichment** | | --- | --- | --- | --- | |
| --- | --- | --- | --- | --- |
| | GO:0045944~positive regulation of transcription from RNA polymerase II promoter | 46 | 9.1268E-21 | 9.3608 | | --- | --- | --- | --- | | GO:0043066~negative regulation of apoptotic process | 22 | 6.1513E-10 | 19.0818 | | GO:0010628~positive regulation of gene expression | 16 | 1.2008E-8 | 17.2351 | | GO:0008284~positive regulation of cell proliferation | 19 | 1.6961E-7 | 8.2964 | | GO:0071456~cellular response to hypoxia | 9 | 2.1828E-6 | 16.1906 | | GO:0008283~cell proliferation | 15 | 4.8407E-6 | 8.8069 | | GO:0032869~cellular response to insulin stimulus | 7 | 6.2288E-5 | 10.5278 | | GO:0006260~DNA replication | 9 | 7.2942E-5 | 10.1769 | | GO:0050731~positive regulation of peptidyl-tyrosine phosphorylation | 7 | 8.8709E-5 | 7.3079 | | GO:0045892~negative regulation of transcription, DNA-templated | 15 | 1.4491E-4 | 5.4875 | | GO:0070301~cellular response to hydrogen peroxide | 6 | 1.4852E-4 | 4.0785 | | GO:0050679~positive regulation of epithelial cell proliferation | 6 | 1.8964E-4 | 5.7388 | | GO:0000082~G1/S transition of mitotic cell cycle | 7 | 2.9503E-4 | 13.8776 | | GO:0042517~positive regulation of tyrosine phosphorylation of Stat3 protein | 5 | 3.4756E-4 | 7.4465 | | GO:0048015~phosphatidylinositol-mediated signaling | 7 | 3.6309E-4 | 15.2654 | | GO:0033138~positive regulation of peptidyl-serine phosphorylation | 6 | 3.9143E-4 | 9.3461 | | GO:0042523~positive regulation of tyrosine phosphorylation of Stat5 protein | 4 | 4.2497E-4 | 23.4853 | | GO:0010595~positive regulation of endothelial cell migration | 5 | 7.2730E-4 | 3.8592 | | GO:0008285~negative regulation of cell proliferation | 12 | 8.22971E-4 | 6.0258 | | GO:1901796~regulation of signal transduction by p53 class mediator | 7 | 8.34377E-4 | 5.8713 | | GO:0051726~regulation of cell cycle | 7 | 8.34377E-4 | 7.78849 | | GO:0051897~positive regulation of protein kinase B signaling | 6 | 9.0414E-4 | 28.6227 | | GO:0000715~nucleotide-excision repair, DNA damage recognition | 4 | 0.0010 | 5.45194 | | GO:0045727~positive regulation of translation | 5 | 0.0012 | 9.54090 | | GO:0032355~response to estradiol | 6 | 0.0012 | 9.5409 | |
